# Supplementary material
Source: publisher figshare collection journal article supplement (https://acs.figshare.com/ndownloader/files/25732678)
Supplement: Supplementary file 1 [file 25732678]

# **Supplemental Materials:**

## **Molecular Origin of the Prepeak in the**

## **Structure Factor of Alcohols**

Aziz Ghoufi\*

*Institut de Physique de Rennes, IPR, CNRS-Université de Rennes 1, UMR CNRS 6251,  
35042 Rennes, France.*

E-mail: [aziz.ghoufi@univ-rennes1.fr](mailto:aziz.ghoufi@univ-rennes1.fr)

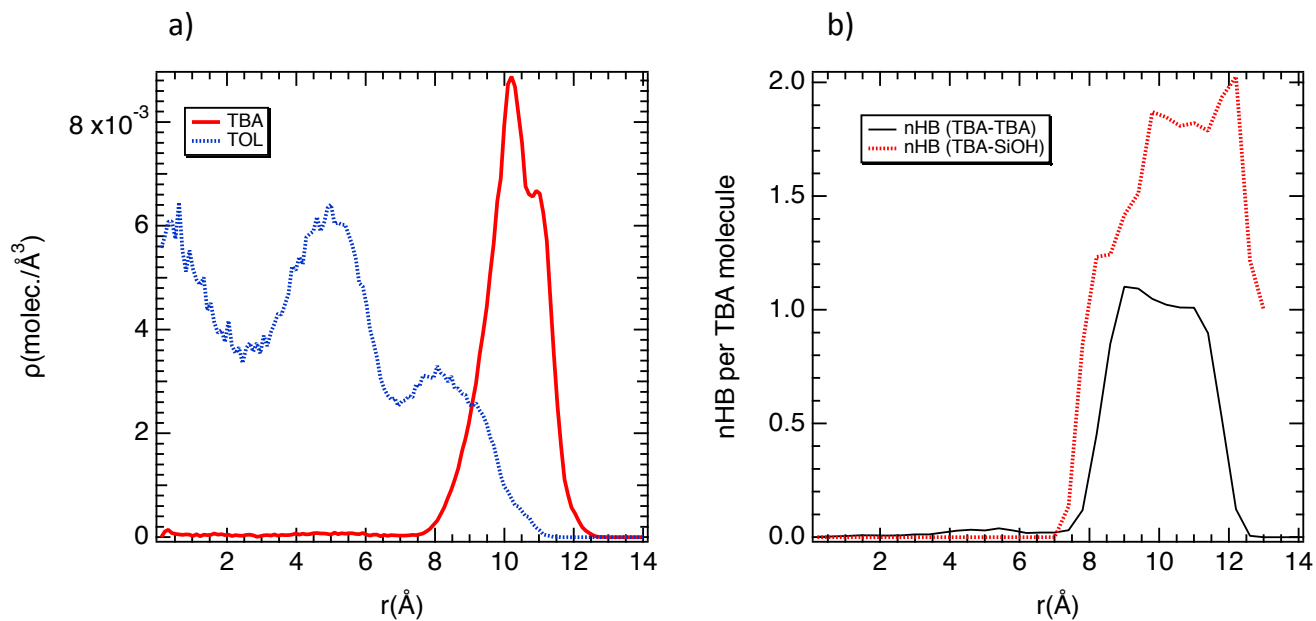

Figure S1: a) Profile of the density of centre of mass of TBA and TOL confined in the SiOH-R12 along the radial direction. b) Profile of the hydrogen bonds number between TBA molecules and between TBA and the silanol groups (SiOH) along the radial direction of the SiOH-R12 porous material.

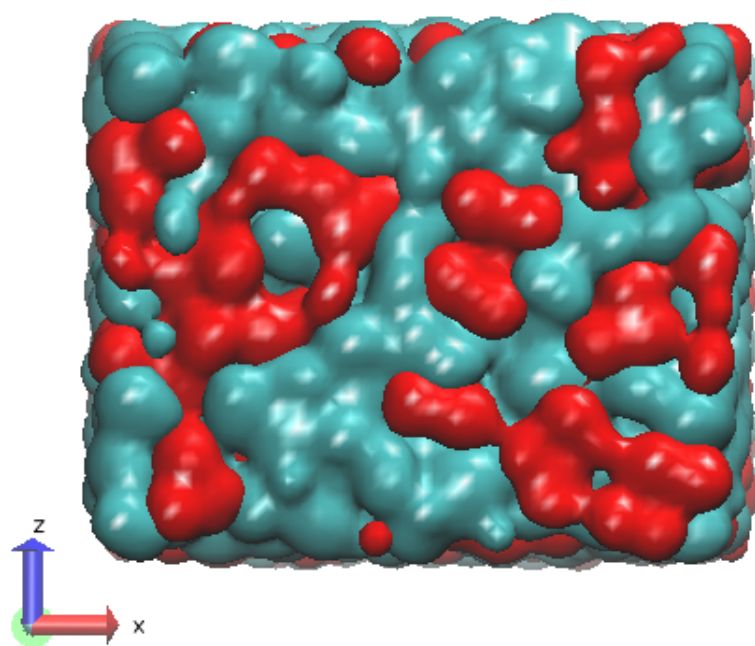

Figure S2: Connolly's surface representation of TBA/TOL binary mixture such that TOL and TBA molecules are represented in cyan and red colors, respectively.

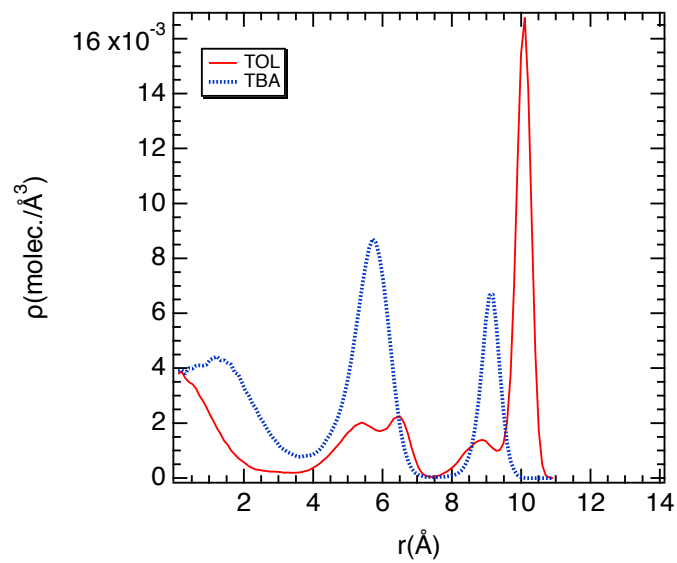

Figure S3: Profile of the density of centre of mass of TBA and TOL confined in the CNT along the radial direction.

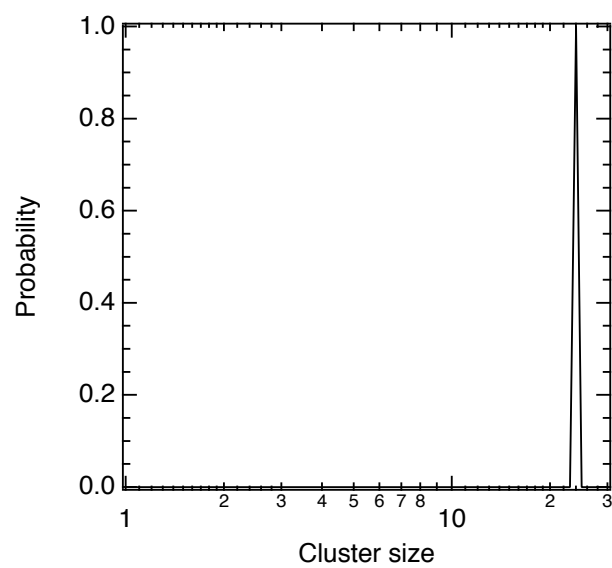

Figure S4: Cluster size distribution of TBA molecules for the TBA/TOL binary mixture confined in SiOH-R6.

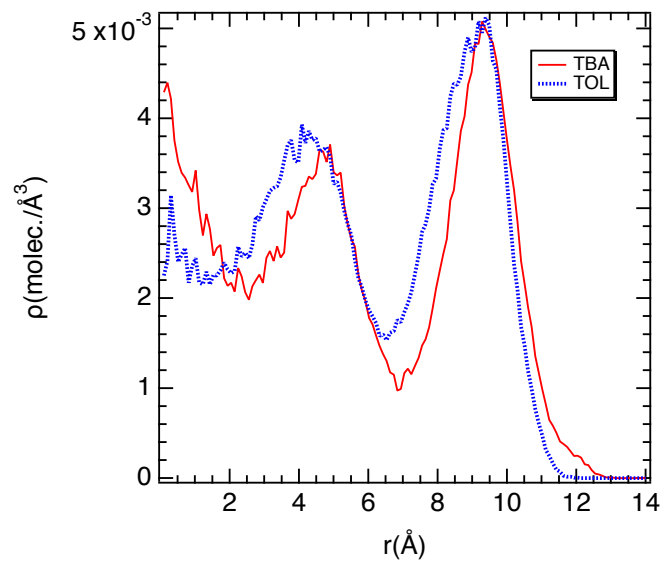

Figure S5: Profile of the density of centre of mass of TBA and TOL confined in the weakly hydrated (WH) silica porous material of radius of 12 Å along the radial direction.
